# Supplementary material
Source: PubMed Central journal article supplement (PMC8026772)
Supplement: NIHMS1682512-supplement-1.pdf [file NIHMS1682512-supplement-1.pdf]

**Supplemental Table 1: Septic Patient Etiologies**

| <b>Cohort</b> | <b>Subjects</b> | <b>Primary Diagnosis</b>                                 | <b>Source of Infection</b> | <b>Organism</b>                                                                             |
|---------------|-----------------|----------------------------------------------------------|----------------------------|---------------------------------------------------------------------------------------------|
| Sepsis        | Patient 1       | GI Bleed                                                 | Wound Infection            | Acinetobacter, Pseudomonas, Enterococcus faecium, B. Fragilis, Stenotrophomonas maltophilia |
| Sepsis        | Patient 2       | Respiratory Failure                                      | Peritonitis                | Mixed gram positive microorganisms                                                          |
| Sepsis        | Patient 3       | Septic Shock                                             | PNA                        | Escherichia coli, MRSA                                                                      |
| Sepsis        | Patient 4       | Pneumatosis Coli                                         | Peritonitis                | Staphylococcus species                                                                      |
| Sepsis        | Patient 5       | MSSA Bacteremia                                          | Wound Infection            | Staphylococcus aureus                                                                       |
| Sepsis        | Patient 6       | Arterial Thromboembolus                                  | Peritonitis                | Unknown                                                                                     |
| Sepsis        | Patient 7       | Toxic Metabolic Encephalopathy                           | Peritonitis                | Unknown                                                                                     |
| Sepsis        | Patient 8       | Acute on Chronic Respiratory Failure                     | Wound Infection            | Staphylococcus epidermidis                                                                  |
| Sepsis        | Patient 9       | Diabetic Ketoacidosis                                    | PNA                        | Unknown                                                                                     |
| Sepsis        | Patient 10      | Septic Shock                                             | PNA                        | Coronavirus HKU1 RNA                                                                        |
| Sepsis        | Patient 11      | Sepsis due to Urinary Tract Infection                    | UTI                        | Enterobacter species                                                                        |
| Sepsis        | Patient 12      | Perforated Diverticulum                                  | Peritonitis                | Unknown                                                                                     |
| Sepsis        | Patient 13      | Septic Shock                                             | UTI                        | Escherichia coli                                                                            |
| Sepsis        | Patient 14      | Septic Shock                                             | PNA                        | Streptococcus species                                                                       |
| Sepsis        | Patient 15      | Necrotizing Pancreatitis                                 | UTI                        | Escherichia coli, Enterococcus faecalis                                                     |
| Sepsis        | Patient 16      | Leg Ulceration                                           | Peritonitis                | Escherichia coli                                                                            |
| Sepsis        | Patient 17      | Syncope                                                  | PNA                        | Unknown                                                                                     |
| Sepsis        | Patient 18      | Altered mental status                                    | Central Nervous            | Unknown                                                                                     |
| Sepsis        | Patient 19      | Gunshot Wound                                            | PNA                        | Unknown                                                                                     |
| CINS          | Patient 1       | Polytrauma, Skull Fracture and Subarachnoid Hemorrhage   |                            |                                                                                             |
| CINS          | Patient 2       | Surgical Repair for Closed Fracture of Thyroid Cartilage |                            |                                                                                             |
| CINS          | Patient 3       | Pelvic Ring Fracture                                     |                            |                                                                                             |
| CINS          | Patient 4       | Popliteal Arterial Occlusion, left                       |                            |                                                                                             |
| CINS          | Patient 5       | Motor Vehicle Collision                                  |                            |                                                                                             |
| CINS          | Patient 6       | Desmoid Tumor Resection, paraspinal                      |                            |                                                                                             |

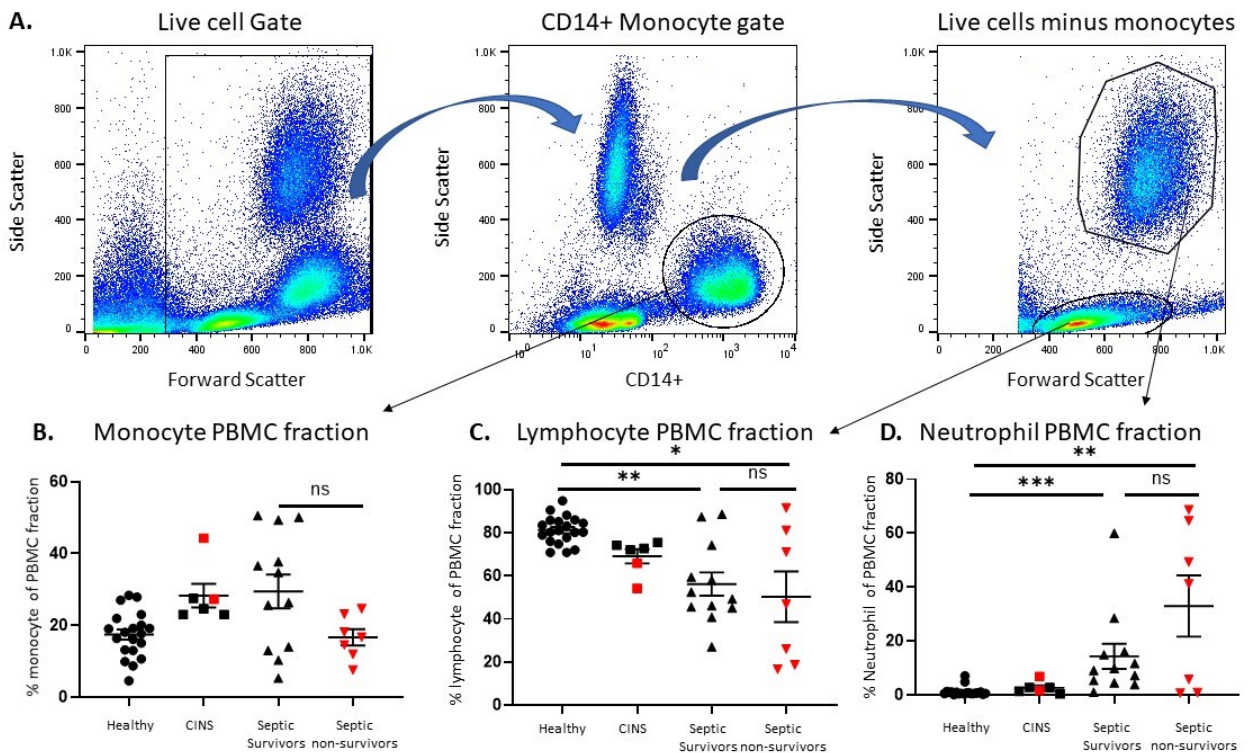

## Supplemental figure 1:

Gating strategy for cell typing by flow cytometry. (A) A preliminary size gate on a Forward x Side scatter plot was created to discern cells from debris. This gate was interrogated for CD14 positivity (Monocytes). A subsequent gate which excluded the monocytes (Boolean “not” gate) was utilized to determine lymphocyte and granulocyte population percentages on a Forward x Side scatter plot. Dot plots showing relative percentages of cell types forming the PBMC fraction in healthy controls (n=20), CINS (n=6), sepsis survivors (n=12) and sepsis non-survivors (n=7). (B) Monocyte fraction of PBMCs, (C) lymphocyte fraction of PBMCs and (D) neutrophil fraction of PBMCs. Bars represent mean +/- SEM. Statistical analysis performed with Kruskal Wallis test with multiple comparisons corrected using Dunn’s test (\*:  $p < 0.05$ , \*\*:  $p < 0.01$ , \*\*\*:  $p < 0.001$ ). Red dots represent mortalities.

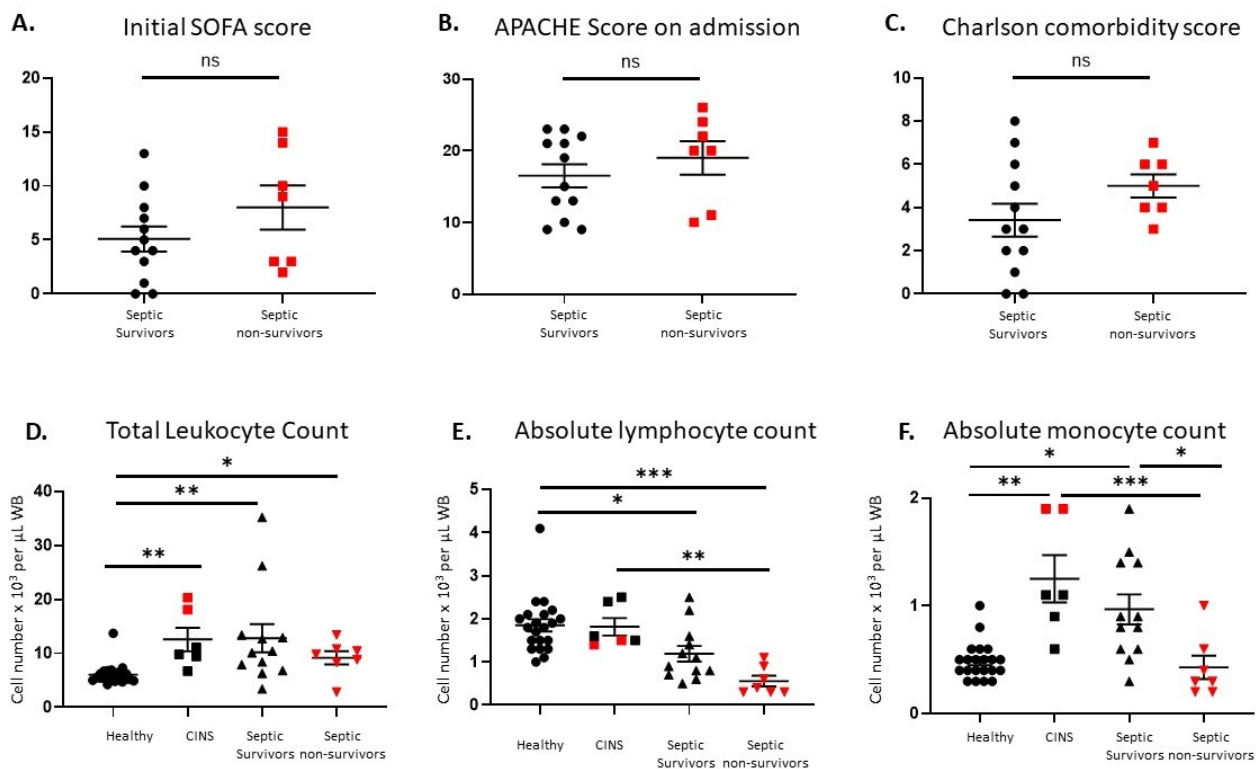

## Supplemental figure 2:

Comparison between surviving and non-surviving patients with sepsis in terms of severity scoring and comorbidities. There is no significant difference between sepsis survivors (n=12) vs. non-survivors (n=7) for sequential organ failure assessment (SOFA) score (A), Acute physiology and chronic health evaluation (APACHE) II score (B), or Charlson comorbidity score (C). (D, E, F) Dot plots of absolute leukocyte, lymphocyte and monocyte counts based on clinical labs on the day of initial blood draw for healthy control (n=20), CINS (n=6), sepsis survivors (n=12) and sepsis non-survivors (n=7). Bars represent mean +/- SEM. Group comparison using Kruskal Wallis test with multiple comparisons corrected for false discovery rate (\*:  $p < 0.05$ , \*\*:  $p < 0.01$ , \*\*\*:  $p < 0.001$ , \*\*\*\*:  $p < 0.0001$ ).

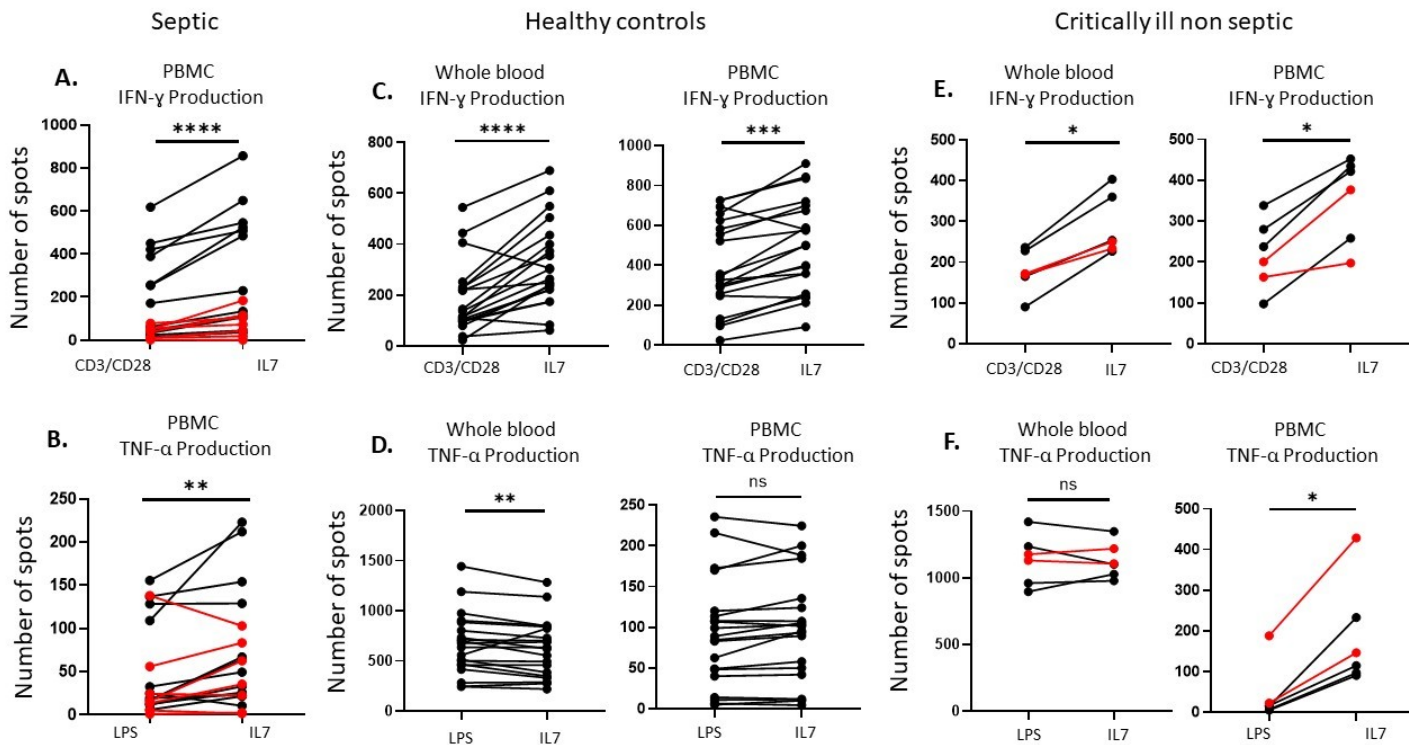

Supplemental figure 3:

IFN- $\gamma$  and TNF- $\alpha$  production in response to *ex vivo* IL-7 administration for whole blood and PBMC ELISpot in healthy controls (n=20), CINS (n=6) and septic patients (n=19). (A) Change IFN- $\gamma$  SFU to IL-7 in septic PBMC assay. (B) Change in TNF- $\alpha$  SFU to IL-7 for septic PBMC assay. (C) Change in IFN- $\gamma$  production in response to IL-7 for healthy controls. (D) Change in TNF- $\alpha$  production in response to IL-7 for healthy controls. (E) Change in IFN- $\gamma$  production in response to IL-7 for CINS. (F) Change in TNF- $\alpha$  production in response to IL-7 for CINS. The number of spots is reported as total number of spots per well and are not corrected for blood volume or cell number. Lines in red depict mortality. Statistical analysis performed using paired Wilcoxon ranked sum test (\*:  $p < 0.05$ , \*\*:  $p < 0.01$ , \*\*\*:  $p < 0.001$ , \*\*\*\*:  $p < 0.0001$ ).
